# Supplementary material for: Machine learning methods for multi-walled carbon nanotubes (MWCNT) genotoxicity prediction
Source: Royal Society of Chemistry journal article supplement (doi:10.1039/d0na00600a), 2021-01-01
Supplement: d0na00600a1.pdf [file d0na00600a1.pdf]

**Table S1. Full MWCNTs dataset table**

| Index | Code <sup>1</sup> | Group <sup>1</sup> | Type <sup>1</sup>          | Length<br>ave. <sup>1</sup><br>(nm)    | Diameter<br>ave. <sup>1</sup><br>(nm) | Diameter<br>std <sup>1</sup><br>(nm)           | BET <sup>1</sup><br>(m <sup>2</sup> /g) | %Fe <sup>1</sup>                              | %Co <sup>1</sup>                   | %Ni <sup>1</sup> |
|-------|-------------------|--------------------|----------------------------|----------------------------------------|---------------------------------------|------------------------------------------------|-----------------------------------------|-----------------------------------------------|------------------------------------|------------------|
| 0     | NRCWE-040         | Group I            | PRISTINE                   | 518.9                                  | 22.1                                  | 7.8                                            | 150                                     | 0.2                                           | 0.001                              | 518.9            |
| 1     | NRCWE-041         | Group I            | OH                         | 1005                                   | 26.9                                  | 10.1                                           | 152                                     | 0.13                                          | 0.001                              | 1005             |
| 2     | NRCWE-042         | Group I            | COOH                       | 723.2                                  | 30.2                                  | 14.2                                           | 141                                     | 0.08                                          | 0                                  | 723.2            |
| 3     | NRCWE-043         | Group II           | PRISTINE                   | 771.3                                  | 55.6                                  | 18.1                                           | 82                                      | 0.008                                         | 0.001                              | 771.3            |
| 4     | NRCWE-044         | Group II           | OH                         | 1330                                   | 32.7                                  | 13.6                                           | 74                                      | 0.004                                         | 0.002                              | 1330             |
| 5     | NRCWE-045         | Group II           | COOH                       | 1553                                   | 30.2                                  | 15.6                                           | 119                                     | 1.17                                          | 0.25                               | 1553             |
| 6     | NRCWE-046         | Group III          | PRISTINE                   | 717.2                                  | 29.1                                  | 16.1                                           | 223                                     | 0.008                                         | 0.25                               | 717.2            |
| 7     | NRCWE-047         | Group III          | OH                         | 532.5                                  | 22.6                                  | 10.1                                           | 216                                     | 0.007                                         | 0.25                               | 532.5            |
| 8     | NRCWE-048         | Group III          | COOH                       | 1604                                   | 17.9                                  | 17.9                                           | 185                                     | 0.007                                         | 0.24                               | 1604             |
| 9     | NRCWE-049         | Group III          | NH2                        | 731.1                                  | 14.9                                  | 5.6                                            | 199                                     | 0.004                                         | 0.25                               | 731.1            |
| 10    | NM-400            | Standard materials | PRISTINE                   | 847                                    | 11                                    | 3.0                                            | 254                                     | 0.2607                                        | 0.1063                             | 847              |
| 11    | NM-401            | Standard materials | PRISTINE                   | 4048                                   | 67                                    | 24.0                                           | 18                                      | 0.05                                          | -                                  | 4048             |
| 12    | NM-402            | Standard materials | PRISTINE                   | 1372                                   | 11                                    | 3.0                                            | 226                                     | 1.31                                          | -                                  | 1372             |
| 13    | NM-403            | Standard materials | PRISTINE                   | 1373                                   | 13                                    | 3.0                                            | 227                                     | 2.31                                          | -                                  | 1373             |
| 14    | NRCWE-006         | Standard materials | PRISTINE                   | 5700                                   | 65                                    | 25.0                                           | 26                                      | 0.680                                         | -                                  | 5700             |
| Index | %Mg <sup>1</sup>  | %Mn <sup>1</sup>   | Purity <sup>2</sup><br>(%) | Z ave. <sup>3</sup><br>(nm)<br>(batch) | PdI <sup>3</sup><br>(batch)           | Z ave. <sup>3</sup><br>(nm)<br>(12.5<br>µg/ml) | PdI <sup>3</sup><br>(12.5<br>µg/ml)     | Z ave. <sup>3</sup><br>(nm)<br>(200<br>µg/ml) | PdI <sup>3</sup><br>(200<br>µg/ml) | ROS <sup>3</sup> |
| 0     | 0.01              | 0.002              | 98.60                      | 195.6                                  | 0.358                                 | 159                                            | 0.398                                   | 262                                           | 0.408                              | 1.7              |
| 1     | 0.02              | 0.001              | 99.20                      | 218.7                                  | 0.501                                 | 236                                            | 0.484                                   | 235                                           | 0.496                              | 3.0              |

|              |                                     |                                                  |                                                         |                                                   |                                                       |                                                        |                                                        |                                                          |                                                             |                                                       |
|--------------|-------------------------------------|--------------------------------------------------|---------------------------------------------------------|---------------------------------------------------|-------------------------------------------------------|--------------------------------------------------------|--------------------------------------------------------|----------------------------------------------------------|-------------------------------------------------------------|-------------------------------------------------------|
| <b>2</b>     | 0.03                                | 0.001                                            | 99.20                                                   | 195.2                                             | 0.382                                                 | 155                                                    | 0.314                                                  | 190                                                      | 0.425                                                       | 0.8                                                   |
| <b>3</b>     | 0.01                                | -                                                | 98.50                                                   | 177.0                                             | 0.237                                                 | 145                                                    | 0.254                                                  | 154                                                      | 0.306                                                       | 2.3                                                   |
| <b>4</b>     | 0.02                                | -                                                | 98.60                                                   | 202.2                                             | 0.236                                                 | 437                                                    | 0.478                                                  | 605                                                      | 0.580                                                       | 1.7                                                   |
| <b>5</b>     | 0.02                                | 0.002                                            | 96.30                                                   | 192.4                                             | 0.227                                                 | 336                                                    | 0.477                                                  | 295                                                      | 0.391                                                       | 1.5                                                   |
| <b>6</b>     | 0.22                                | 0.3                                              | 98.70                                                   | 182.9                                             | 0.434                                                 | 598                                                    | 0.504                                                  | 1159                                                     | 0.497                                                       | 6.6                                                   |
| <b>7</b>     | 0.22                                | 0.3                                              | 98.70                                                   | 200.1                                             | 0.402                                                 | 244                                                    | 0.446                                                  | 307                                                      | 0.484                                                       | 2.1                                                   |
| <b>8</b>     | 0.19                                | 0.28                                             | 98.80                                                   | 182.2                                             | 0.397                                                 | 152                                                    | 0.465                                                  | 128                                                      | 0.372                                                       | 2.1                                                   |
| <b>9</b>     | 0.19                                | 0.29                                             | 98.80                                                   | 212.5                                             | 0.602                                                 | 197                                                    | 0.867                                                  | 217                                                      | 0.639                                                       | 3.4                                                   |
| <b>10</b>    | -                                   | -                                                | 90.00                                                   | 168.1                                             | 0.385                                                 | 274                                                    | 0.582                                                  | 270                                                      | 0.592                                                       | 5.1                                                   |
| <b>11</b>    | 0.015                               | -                                                | 99.19                                                   | 923.8                                             | 0.323                                                 | 570                                                    | 0.463                                                  | 652                                                      | 0.502                                                       | 0.0                                                   |
| <b>12</b>    | 0.001                               | 0.001                                            | 92.97                                                   | 171.3                                             | 0.407                                                 | 456                                                    | 0.482                                                  | 213                                                      | 0.465                                                       | 7.7                                                   |
| <b>13</b>    | 1.001                               | 1.001                                            | 90.00                                                   | 200.2                                             | 0.407                                                 | 587                                                    | 0.514                                                  | 291                                                      | 0.506                                                       | 1.9                                                   |
| <b>14</b>    | -                                   | -                                                | 99.00                                                   | 633.3                                             | 0.256                                                 | 832                                                    | 0.459                                                  | 2102                                                     | 0.448                                                       | 0.3                                                   |
| <b>Index</b> | <b>Peak<sup>3</sup><br/>(µg/ml)</b> | <b>0 µg/ml<br/>viability<sup>3</sup><br/>(%)</b> | <b>12.5<br/>µg/ml<br/>viability<sup>3</sup><br/>(%)</b> | <b>25 µg/ml<br/>viability<sup>3</sup><br/>(%)</b> | <b>50<br/>µg/ml<br/>viability<sup>3</sup><br/>(%)</b> | <b>100<br/>µg/ml<br/>viability<sup>3</sup><br/>(%)</b> | <b>200<br/>µg/ml<br/>viability<sup>3</sup><br/>(%)</b> | <b>0<br/>µg/ml<br/>proliferation<sup>3</sup><br/>(%)</b> | <b>12.5<br/>µg/ml<br/>proliferation<sup>3</sup><br/>(%)</b> | <b>25 µg/ml<br/>proliferation<sup>3</sup><br/>(%)</b> |
| <b>0</b>     | 12.50                               | 94                                               | 95                                                      | 96                                                | 97                                                    | 97                                                     | 99                                                     | 100                                                      | 95                                                          | 85                                                    |
| <b>1</b>     | 12.50                               | 93                                               | 94                                                      | 96                                                | 96                                                    | 96                                                     | 98                                                     | 100                                                      | 79                                                          | 62                                                    |
| <b>2</b>     | 12.50                               | 94                                               | 95                                                      | 96                                                | 97                                                    | 98                                                     | 99                                                     | 100                                                      | 89                                                          | 96                                                    |
| <b>3</b>     | 12.50                               | 96                                               | 96                                                      | 98                                                | 98                                                    | 99                                                     | 99                                                     | 100                                                      | 105                                                         | 115                                                   |
| <b>4</b>     | 12.50                               | 96                                               | 96                                                      | 97                                                | 98                                                    | 98                                                     | 99                                                     | 100                                                      | 99                                                          | 96                                                    |
| <b>5</b>     | 12.50                               | 94                                               | 97                                                      | 96                                                | 98                                                    | 98                                                     | 98                                                     | 100                                                      | 95                                                          | 100                                                   |

|              |                                                                 |                                                              |                                                              |                                               |                                         |                                      |                                                 |                                       |     |     |
|--------------|-----------------------------------------------------------------|--------------------------------------------------------------|--------------------------------------------------------------|-----------------------------------------------|-----------------------------------------|--------------------------------------|-------------------------------------------------|---------------------------------------|-----|-----|
| <b>6</b>     | 6.25                                                            | 96                                                           | 98                                                           | 98                                            | 98                                      | 99                                   | 99                                              | 100                                   | 93  | 88  |
| <b>7</b>     | 6.25                                                            | 97                                                           | 99                                                           | 99                                            | 99                                      | 99                                   | 99                                              | 100                                   | 99  | 105 |
| <b>8</b>     | 6.25                                                            | 97                                                           | 97                                                           | 98                                            | 98                                      | 99                                   | 100                                             | 100                                   | 95  | 97  |
| <b>9</b>     | 12.50                                                           | 96                                                           | 97                                                           | 97                                            | 99                                      | 99                                   | 98                                              | 100                                   | 95  | 80  |
| <b>10</b>    | 5.60                                                            | 97                                                           | 97                                                           | 98                                            | 99                                      | 99                                   | 98                                              | 100                                   | 105 | 105 |
| <b>11</b>    | 11.25                                                           | 96                                                           | 96                                                           | 94                                            | 94                                      | 95                                   | 95                                              | 100                                   | 77  | 64  |
| <b>12</b>    | 12.50                                                           | 97                                                           | 97                                                           | 98                                            | 98                                      | 99                                   | 96                                              | 100                                   | 113 | 100 |
| <b>13</b>    | 12.50                                                           | 96                                                           | 97                                                           | 98                                            | 98                                      | 99                                   | 98                                              | 100                                   | 83  | 94  |
| <b>14</b>    | 11.25                                                           | 95                                                           | 94                                                           | 93                                            | 93                                      | 91                                   | 94                                              | 100                                   | 75  | 73  |
| <b>Index</b> | <b>50<br/>µg/ml<br/>prolife-<br/>ration<sup>3</sup><br/>(%)</b> | <b>100 µg/ml<br/>prolife-<br/>ration<sup>3</sup><br/>(%)</b> | <b>200 µg/ml<br/>prolife-<br/>ration<sup>3</sup><br/>(%)</b> | <b>CEA:<br/>C.H.N.O<sup>3</sup><br/>(wt%)</b> | <b>OH<sup>3</sup><br/>(mmol/g<br/>)</b> | <b>COOH<sup>3</sup><br/>(mmol/g)</b> | <b>Endo-<br/>toxins<sup>3</sup><br/>(EU/ml)</b> | <b>Geno-<br/>toxicity<sup>2</sup></b> |     |     |
| <b>0</b>     | 60                                                              | 67                                                           | 62                                                           | 96.00                                         | 0.35                                    | 0.18                                 | 0.18                                            | 0                                     |     |     |
| <b>1</b>     | 50                                                              | 54                                                           | 59                                                           | 97.00                                         | 1.69                                    | 0.84                                 | 0.44                                            | 0                                     |     |     |
| <b>2</b>     | 72                                                              | 79                                                           | 56                                                           | 96.00                                         | 4.09                                    | 2.04                                 | 0.26                                            | 0                                     |     |     |
| <b>3</b>     | 114                                                             | 111                                                          | 101                                                          | 96.00                                         | 0.18                                    | 0.09                                 | 0.25                                            | 0                                     |     |     |
| <b>4</b>     | 95                                                              | 91                                                           | 77                                                           | 97.00                                         | 0.23                                    | 0.11                                 | 0.27                                            | 1                                     |     |     |
| <b>5</b>     | 104                                                             | 79                                                           | 29                                                           | 93.00                                         | 0.63                                    | 0.31                                 | 0.34                                            | 1                                     |     |     |
| <b>6</b>     | 112                                                             | 97                                                           | 10                                                           | 96.00                                         | 0.63                                    | 0.32                                 | 0.19                                            | 0                                     |     |     |
| <b>7</b>     | 90                                                              | 79                                                           | 19                                                           | 97.00                                         | 0.26                                    | 0.13                                 | 0.01                                            | 0                                     |     |     |
| <b>8</b>     | 84                                                              | 81                                                           | 42                                                           | 96.00                                         | 0.58                                    | 0.29                                 | 0.03                                            | 0                                     |     |     |
| <b>9</b>     | 83                                                              | 79                                                           | 20                                                           | 97.00                                         | 0.33                                    | 0.16                                 | 0.05                                            | 0                                     |     |     |

|           |     |     |     |       |      |      |      |   |
|-----------|-----|-----|-----|-------|------|------|------|---|
| <b>10</b> | 121 | 102 | 115 | 88.00 | 0.79 | 0.40 | 0.24 | 1 |
| <b>11</b> | 52  | 50  | 47  | 98.00 | 0.03 | 0.02 | 0.31 | 0 |
| <b>12</b> | 99  | 104 | 47  | 92.00 | 0.28 | 0.14 | 0.01 | 1 |
| <b>13</b> | 77  | 78  | 14  | 97.00 | 0.19 | 0.09 | 0.01 | 1 |
| <b>14</b> | 55  | 55  | 55  | 98.00 | 0.08 | 0.04 | 0.51 | 1 |

**Table S2. Scaled dataset**

| A/A       | Length<br>ave.            | Diameter<br>ave.          | Diameter<br>max         | Diameter<br>r min       | BET                      | Total<br>Impurities      | Purity                     | Zave<br>batch            | PdI<br>batch             | Zave<br>(12.5<br>µg/ml)   |
|-----------|---------------------------|---------------------------|-------------------------|-------------------------|--------------------------|--------------------------|----------------------------|--------------------------|--------------------------|---------------------------|
| <b>0</b>  | 0.0000                    | 0.1982                    | 0.2065                  | 0.3326                  | 0.559                    | 0.1349                   | 0.9348                     | 0.0364                   | 0.3493                   | 0.0204                    |
| <b>1</b>  | 0.0938                    | 0.2839                    | 0.2987                  | 0.3907                  | 0.5678                   | 0.0757                   | 1.0000                     | 0.0670                   | 0.7307                   | 0.1325                    |
| <b>2</b>  | 0.0394                    | 0.3429                    | 0.3948                  | 0.3721                  | 0.5212                   | 0.0498                   | 1.0000                     | 0.0359                   | 0.4133                   | 0.0146                    |
| <b>3</b>  | 0.0487                    | 0.7964                    | 0.7753                  | 0.8721                  | 0.2712                   | 0.2199                   | 0.9239                     | 0.0118                   | 0.0267                   | 0.0000                    |
| <b>4</b>  | 0.1565                    | 0.3875                    | 0.4195                  | 0.4442                  | 0.2373                   | 0.1907                   | 0.9348                     | 0.0451                   | 0.0240                   | 0.4250                    |
| <b>5</b>  | 0.1996                    | 0.3429                    | 0.4130                  | 0.3395                  | 0.4280                   | 0.5177                   | 0.6848                     | 0.0322                   | 0.0000                   | 0.2780                    |
| <b>6</b>  | 0.0383                    | 0.3232                    | 0.4052                  | 0.3023                  | 0.8686                   | 0.1368                   | 0.9456                     | 0.0196                   | 0.5520                   | 0.6594                    |
| <b>7</b>  | 0.0026                    | 0.2071                    | 0.2429                  | 0.2907                  | 0.8390                   | 0.1364                   | 0.9456                     | 0.0423                   | 0.4667                   | 0.1441                    |
| <b>8</b>  | 0.2094                    | 0.1232                    | 0.2831                  | 0.0000                  | 0.7076                   | 0.1250                   | 0.9565                     | 0.0187                   | 0.4533                   | 0.0102                    |
| <b>9</b>  | 0.0410                    | 0.0696                    | 0.0844                  | 0.2163                  | 0.7669                   | 0.1282                   | 0.9565                     | 0.0587                   | 1.0000                   | 0.0757                    |
| <b>10</b> | 0.0633                    | 0.0000                    | 0.0000                  | 0.1861                  | 1.0000                   | 0.0577                   | 0.0000                     | 0.0000                   | 0.4213                   | 0.1878                    |
| <b>11</b> | 0.6811                    | 1.0000                    | 1.0000                  | 1.0000                  | 0.0000                   | 0.0000                   | 0.9989                     | 1.0000                   | 0.2560                   | 0.6187                    |
| <b>12</b> | 0.1647                    | 0.0000                    | 0.0000                  | 0.1861                  | 0.8814                   | 0.2378                   | 0.3228                     | 0.0042                   | 0.4800                   | 0.4527                    |
| <b>13</b> | 0.1649                    | 0.0357                    | 0.0260                  | 0.2326                  | 0.8856                   | 1.0000                   | 0.0000                     | 0.0425                   | 0.4800                   | 0.6434                    |
| <b>14</b> | 1.0000                    | 0.9643                    | 0.9870                  | 0.9302                  | 0.0339                   | 0.1172                   | 0.9783                     | 0.6156                   | 0.0773                   | 1.0000                    |
| A/A       | PdI<br>(12.5<br>µg/ml)    | Zave<br>(200<br>µg/ml)    | PdI<br>(200<br>µg/ml)   | ROS                     | Peak                     | 0<br>µg/ml<br>viability  | 12.5<br>µg/ml<br>viability | 25<br>µg/ml<br>viability | 50<br>µg/ml<br>viability | 100<br>µg/ml<br>viability |
| <b>0</b>  | 0.2349                    | 0.0679                    | 0.3063                  | 0.2208                  | 1.0000                   | 0.2500                   | 0.2000                     | 0.5000                   | 0.6667                   | 0.7500                    |
| <b>1</b>  | 0.3752                    | 0.0542                    | 0.5706                  | 0.3896                  | 1.0000                   | 0.0000                   | 0.0000                     | 0.5000                   | 0.5000                   | 0.6250                    |
| <b>2</b>  | 0.0979                    | 0.0314                    | 0.3574                  | 0.1039                  | 1.0000                   | 0.2500                   | 0.2000                     | 0.5000                   | 0.6667                   | 0.8750                    |
| <b>3</b>  | 0.0000                    | 0.0132                    | 0.0000                  | 0.2987                  | 1.0000                   | 0.7500                   | 0.4000                     | 0.8333                   | 0.8333                   | 1.0000                    |
| <b>4</b>  | 0.3654                    | 0.2416                    | 0.8228                  | 0.2208                  | 1.0000                   | 0.7500                   | 0.4000                     | 0.6667                   | 0.8333                   | 0.8750                    |
| <b>5</b>  | 0.3638                    | 0.0846                    | 0.2553                  | 0.1948                  | 1.0000                   | 0.2500                   | 0.6000                     | 0.5000                   | 0.8333                   | 0.8750                    |
| <b>6</b>  | 0.4078                    | 0.5223                    | 0.5736                  | 0.8571                  | 0.0942                   | 0.7500                   | 0.8000                     | 0.8333                   | 0.8333                   | 1.0000                    |
| <b>7</b>  | 0.3132                    | 0.0907                    | 0.5345                  | 0.2727                  | 0.0942                   | 1.0000                   | 1.0000                     | 1.0000                   | 1.0000                   | 1.0000                    |
| <b>8</b>  | 0.3442                    | 0.0000                    | 0.1982                  | 0.2727                  | 0.0942                   | 1.0000                   | 0.6000                     | 0.8333                   | 0.8333                   | 1.0000                    |
| <b>9</b>  | 1.0000                    | 0.0451                    | 1.0000                  | 0.4416                  | 1.0000                   | 0.7500                   | 0.6000                     | 0.6667                   | 1.0000                   | 1.0000                    |
| <b>10</b> | 0.5351                    | 0.0719                    | 0.8589                  | 0.6623                  | 0.0000                   | 1.0000                   | 0.6000                     | 0.8333                   | 1.0000                   | 1.0000                    |
| <b>11</b> | 0.3409                    | 0.2654                    | 0.5886                  | 0.0000                  | 0.8188                   | 0.7500                   | 0.4000                     | 0.1667                   | 0.1667                   | 0.5000                    |
| <b>12</b> | 0.3719                    | 0.043                     | 0.4775                  | 1.0000                  | 1.0000                   | 1.0000                   | 0.6000                     | 0.8333                   | 0.8333                   | 1.0000                    |
| <b>13</b> | 0.4241                    | 0.0826                    | 0.6006                  | 0.2467                  | 1.0000                   | 0.7500                   | 0.6000                     | 0.8333                   | 0.8333                   | 1.0000                    |
| <b>14</b> | 0.3344                    | 1.0000                    | 0.4264                  | 0.0390                  | 0.8188                   | 0.5000                   | 0.0000                     | 0.0000                   | 0.0000                   | 0.0000                    |
| A/A       | 200<br>µg/ml<br>viability | 12.5<br>µg/ml<br>prolife- | 25<br>µg/ml<br>prolife- | 50<br>µg/ml<br>prolife- | 100<br>µg/ml<br>prolife- | 200<br>µg/ml<br>prolife- | CEA:<br>C,H,O,N            | OH                       | COOH                     | Endo-<br>toxins           |

|            | <b>ration</b>    | <b>ration</b>   | <b>ration</b>  | <b>ration</b>         | <b>ration</b>        | <b>ration</b> | <b>ration</b> | <b>ration</b> | <b>ration</b> | <b>ration</b> |
|------------|------------------|-----------------|----------------|-----------------------|----------------------|---------------|---------------|---------------|---------------|---------------|
| <b>0</b>   | 0.8333           | 0.5263          | 0.4340         | 0.1408                | 0.2787               | 0.4952        | 0.8000        | 0.0788        | 0.0792        | 0.3400        |
| <b>1</b>   | 0.6667           | 0.1053          | 0.0000         | 0.0000                | 0.0656               | 0.4667        | 0.9000        | 0.4089        | 0.4059        | 0.3400        |
| <b>2</b>   | 0.8333           | 0.3684          | 0.6415         | 0.3099                | 0.4754               | 0.4381        | 0.8000        | 1.0000        | 1.0000        | 0.5000        |
| <b>3</b>   | 0.8333           | 0.7895          | 1.0000         | 0.9014                | 1.0000               | 0.8667        | 0.8000        | 0.0369        | 0.0346        | 0.4800        |
| <b>4</b>   | 0.8333           | 0.6316          | 0.6415         | 0.6338                | 0.6721               | 0.6381        | 0.9000        | 0.0493        | 0.0445        | 0.5200        |
| <b>5</b>   | 0.6667           | 0.5263          | 0.7170         | 0.7606                | 0.4754               | 0.1809        | 0.5000        | 0.1478        | 0.1436        | 0.6600        |
| <b>6</b>   | 0.8333           | 0.4737          | 0.4906         | 0.8732                | 0.7705               | 0.0000        | 0.8000        | 0.1478        | 0.1485        | 0.3600        |
| <b>7</b>   | 0.8333           | 0.6316          | 0.8113         | 0.563                 | 0.4754               | 0.0857        | 0.9000        | 0.0566        | 0.0545        | 0.0000        |
| <b>8</b>   | 1.0000           | 0.5263          | 0.6604         | 0.4789                | 0.5082               | 0.3048        | 0.8000        | 0.1355        | 0.1337        | 0.0400        |
| <b>9</b>   | 0.6667           | 0.5263          | 0.3396         | 0.4648                | 0.4754               | 0.0952        | 0.9000        | 0.0739        | 0.0693        | 0.0800        |
| <b>10</b>  | 0.6667           | 0.7895          | 0.8113         | 1.0000                | 0.8525               | 1.0000        | 0.0000        | 0.1872        | 0.1881        | 0.4600        |
| <b>11</b>  | 0.1667           | 0.0526          | 0.0377         | 0.0282                | 0.0000               | 0.3524        | 1.0000        | 0.0000        | 0.0000        | 0.8200        |
| <b>12</b>  | 0.3333           | 1.0000          | 0.7170         | 0.6901                | 0.8852               | 0.3524        | 0.4000        | 0.0616        | 0.0594        | 0.0000        |
| <b>13</b>  | 0.6667           | 0.2105          | 0.6038         | 0.3803                | 0.4590               | 0.0381        | 0.9000        | 0.0394        | 0.0346        | 0.0000        |
| <b>14</b>  | 0.0000           | 0.0000          | 0.2075         | 0.0704                | 0.0820               | 0.4286        | 1.0000        | 0.0123        | 0.0099        | 1.0000        |
| <b>A/A</b> | <b>Type COOH</b> | <b>Type NH2</b> | <b>Type OH</b> | <b>Type PRISTI NE</b> | <b>Geno-toxicity</b> |               |               |               |               |               |
| <b>0</b>   | 0.0000           | 0.0000          | 0.0000         | 1.0000                | 0                    |               |               |               |               |               |
| <b>1</b>   | 0.0000           | 0.0000          | 1.0000         | 0.0000                | 0                    |               |               |               |               |               |
| <b>2</b>   | 1.0000           | 0.0000          | 0.0000         | 0.0000                | 0                    |               |               |               |               |               |
| <b>3</b>   | 0.0000           | 0.0000          | 0.0000         | 1.0000                | 0                    |               |               |               |               |               |
| <b>4</b>   | 0.0000           | 0.0000          | 1.0000         | 0.0000                | 1                    |               |               |               |               |               |
| <b>5</b>   | 1.0000           | 0.0000          | 0.0000         | 0.0000                | 1                    |               |               |               |               |               |
| <b>6</b>   | 0.0000           | 0.0000          | 0.0000         | 1.0000                | 0                    |               |               |               |               |               |
| <b>7</b>   | 0.0000           | 0.0000          | 1.0000         | 0.0000                | 0                    |               |               |               |               |               |
| <b>8</b>   | 1.0000           | 0.0000          | 0.0000         | 0.0000                | 0                    |               |               |               |               |               |
| <b>9</b>   | 0.0000           | 1.0000          | 0.0000         | 0.0000                | 0                    |               |               |               |               |               |
| <b>10</b>  | 0.0000           | 0.0000          | 0.0000         | 1.0000                | 1                    |               |               |               |               |               |
| <b>11</b>  | 0.0000           | 0.0000          | 0.0000         | 1.0000                | 0                    |               |               |               |               |               |
| <b>12</b>  | 0.0000           | 0.0000          | 0.0000         | 1.0000                | 1                    |               |               |               |               |               |
| <b>13</b>  | 0.0000           | 0.0000          | 0.0000         | 1.0000                | 1                    |               |               |               |               |               |
| <b>14</b>  | 0.0000           | 0.0000          | 0.0000         | 1.0000                | 1                    |               |               |               |               |               |

**Table S3. PCA dataset**

| <b>A/A</b> | <b>PC 1</b> | <b>PC 2</b> | <b>PC 3</b> | <b>PC 4</b> | <b>PC 5</b> | <b>PC 6</b> | <b>PC 7</b> | <b>PC 8</b> | <b>PC 9</b> | <b>Genotoxicity</b> |
|------------|-------------|-------------|-------------|-------------|-------------|-------------|-------------|-------------|-------------|---------------------|
| <b>0</b>   | 0.2187      | 0.0456      | 0.0425      | -0.4852     | -0.4652     | 0.1204      | 0.1000      | 0.5607      | -0.2241     | 0                   |
| <b>1</b>   | 0.5249      | 1.1784      | -0.6954     | -0.1097     | -0.6085     | 0.5401      | -0.3300     | 0.1612      | 0.0525      | 0                   |
| <b>2</b>   | 0.1061      | 1.3023      | 0.7826      | -0.6204     | 0.1976      | 0.3805      | 0.0527      | 0.0528      | 0.2026      | 0                   |
| <b>3</b>   | 0.0572      | -0.5460     | 1.2166      | 0.3645      | -0.7096     | -0.3147     | 0.4530      | 0.3280      | -0.0164     | 0                   |
| <b>4</b>   | 0.0367      | 0.3926      | 0.0256      | 0.7897      | -0.6642     | -0.2099     | -0.2244     | -0.5362     | 0.1277      | 1                   |
| <b>5</b>   | -0.0509     | 0.5487      | 0.7410      | -0.3366     | 0.3305      | -0.5234     | -0.2004     | -0.5444     | 0.1450      | 1                   |
| <b>6</b>   | -0.5025     | -0.7042     | -0.2013     | 0.3150      | 0.5228      | 0.2102      | 0.0785      | 0.4440      | 0.7402      | 0                   |
| <b>7</b>   | -0.9193     | 0.3723      | -0.3978     | 1.0885      | 0.1443      | -0.1407     | -0.3306     | 0.2361      | -0.1325     | 0                   |
| <b>8</b>   | -0.7851     | 0.6034      | 0.3461      | 0.2191      | 0.9078      | -0.0598     | 0.0154      | 0.2250      | -0.4000     | 0                   |
| <b>9</b>   | -0.6650     | 0.4813      | -1.0894     | -0.2062     | 0.0315      | -0.2615     | 0.9981      | -0.3187     | 0.0155      | 0                   |
| <b>10</b>  | -1.2646     | -1.0787     | 0.2122      | -0.0467     | 0.0366      | 0.9070      | -0.0900     | -0.4971     | -0.3159     | 1                   |
| <b>11</b>  | 2.1077      | -0.4449     | -0.2175     | 0.1864      | 0.2671      | -0.0380     | 0.2368      | 0.0530      | -0.4026     | 0                   |
| <b>12</b>  | -0.9519     | -0.9321     | -0.0955     | -0.4278     | -0.2666     | -0.0227     | 0.0228      | -0.1122     | 0.1385      | 1                   |
| <b>13</b>  | -0.4856     | -0.6157     | -0.5491     | -0.7773     | -0.0428     | -0.6935     | -0.6374     | 0.1789      | -0.1151     | 1                   |
| <b>14</b>  | 2.5738      | -0.6031     | -0.1206     | 0.0466      | 0.3185      | 0.1060      | -0.1443     | -0.2312     | 0.1846      | 1                   |

Fig S1. Mean and variance of features in the PCA dataset

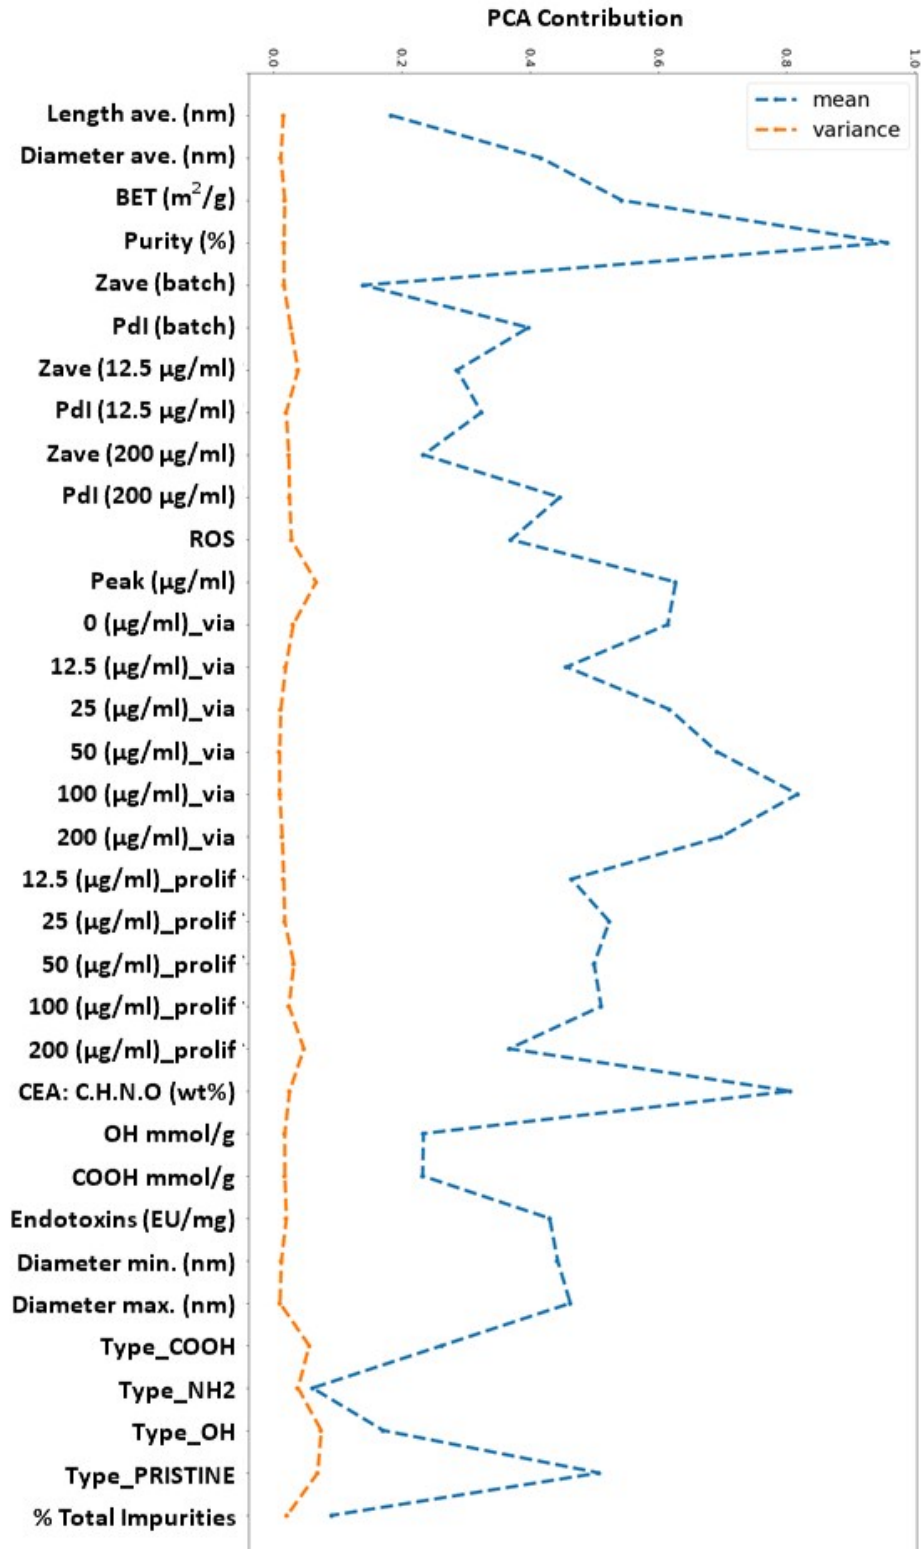

**Eq. S1. Confusion Matrix <sup>4</sup>**

|                  |         | <u>Real</u> |         |
|------------------|---------|-------------|---------|
|                  |         | Class 0     | Class 1 |
| <u>Predicted</u> | Class 0 | TN          | FP      |
|                  | Class 1 | FN          | TP      |

TN (True-Negative): Number of observations that belong in “Class 0” and the model predicted “Class 0”.

TP (True-Positive): Number of observations that belong in “Class 1” and the model predicted “Class 1”.

FN (False-Negative): Number of observations that belong in “Class 1” and the model predicted “Class 0”.

FP (False-Positives): Number of observations that belong in “Class 0” and the model predicted “Class 1”.

**Eq. S2. Precision formula <sup>4</sup>**

$$Precision = \frac{TP}{TP + FP}$$

Where TP represent the “true-positive” and FP the “false-positive” observations.

**Eq. S3. Sensitivity formula <sup>4</sup>**

$$Sensitivity = \frac{TP}{TP + FN}$$

Where TP represent the “true-positive” and FN the “false-negative” observations.

**Eq. S4. Specificity formula <sup>4</sup>**

$$Specificity = \frac{TN}{TN + FP}$$

Where TN represent the “true-negative” and FP the “false-positive” observations.

**Eq. S5. F1-Score formula <sup>4</sup>**

$$F1 - Score = 2 \times \frac{Precision \times Recall}{Precision + Recall}$$

Where Precision and recall as defined above.

**Eq. S6. Accuracy formula <sup>4</sup>**

$$Accuracy = \frac{TP + TN}{TP + TN + FP + FN}$$

Where TP represent the “true-positive”, TN the “true-negative”, FP the “false-positive” and FN the “false-negative” observations.

**Eq. S7. MCC formula <sup>4</sup>**

$$MCC = \frac{TP \times TN - FP \times FN}{\sqrt{(TP + FP)(TP + FN)(TN + FP)(TN + FN)}}$$

Where TP represent the “true-positive”, TN the “true-negative”, FP the “false-positive” and FN the “false-negative” observations.

**References**

---

<sup>1</sup>S. Poulsen, K. Knudsen, P. Jackson, I. Weydahl, A. Saber, H. Wallin and U. Vogel, *PLOS ONE*, 2017, **12**(4), e0174167.

<sup>2</sup> K. Aschberger, D. Asturiol, L. Lamon, A. Richarz, K. Gerloff and A. Worth, *Comput. Toxicol.*, 2019, **9**, 22–35.

<sup>3</sup> P. Jackson, K. Kling, K. Jensen, P. Clausen, A. Madsen, H. Wallin and U. Vogel, *Environ Mol Mutagen.*, 2015, **56**(2), 183-203.

<sup>4</sup> [https://scikit-learn.org/stable/modules/model\\_evaluation.html](https://scikit-learn.org/stable/modules/model_evaluation.html)
